# Supplementary material
Source: publisher site journal article supplement (https://www.dovepress.com/get_supplementary_file.php?f=283742.docx)

**Supplementary material**

**Supplemental Figure** (**A**) SEM images and EDS maps of light-cured resin composites of *L-60si*, *L-50si+10zr*, *L-50si+10Mzr*, *L-40si+20zr*, *L-40si+20Mzr*; (**B**) SEM images and EDS maps of dual-cured resin composites of *D-60si, D-50si+10zr, D-50si+10Mzr, D-40si+20zr, D-40si+20Mzr*.


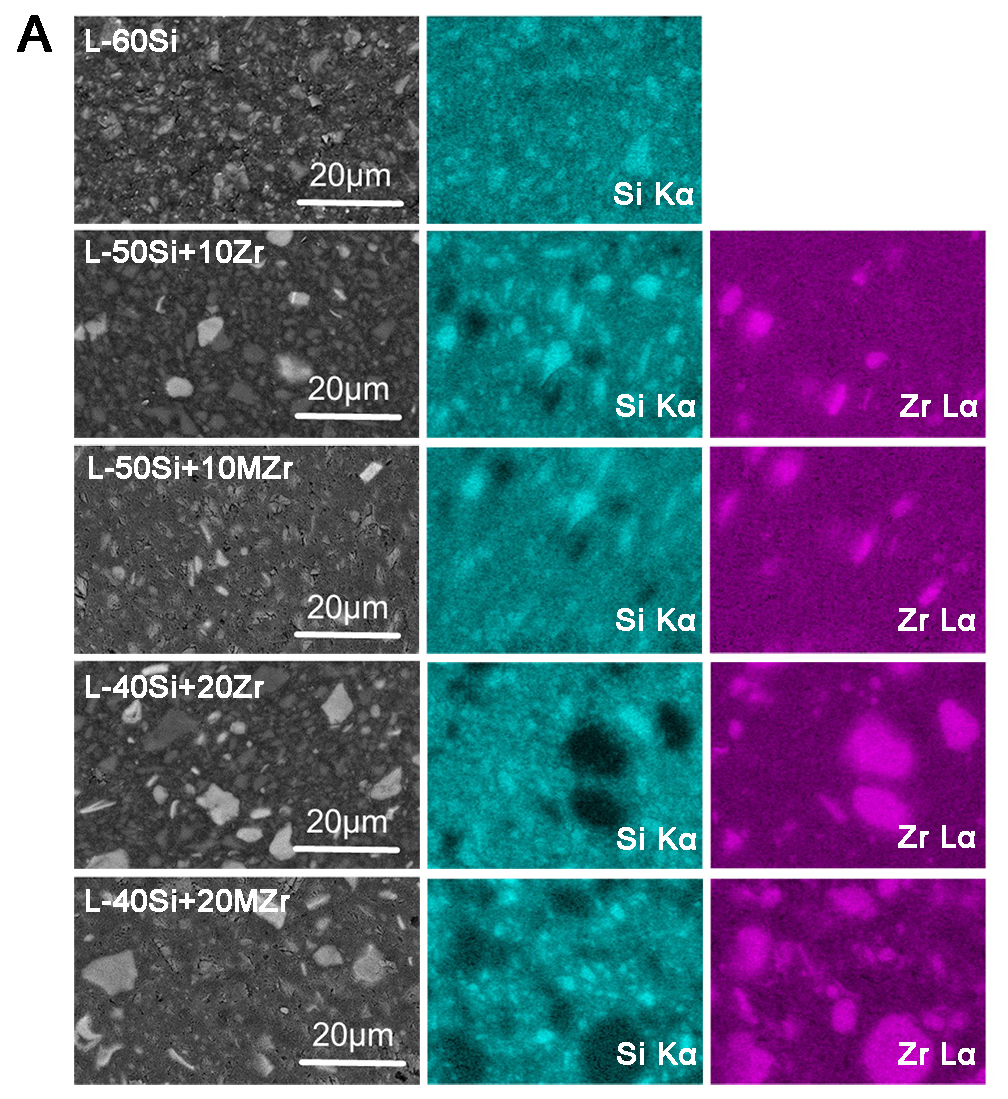


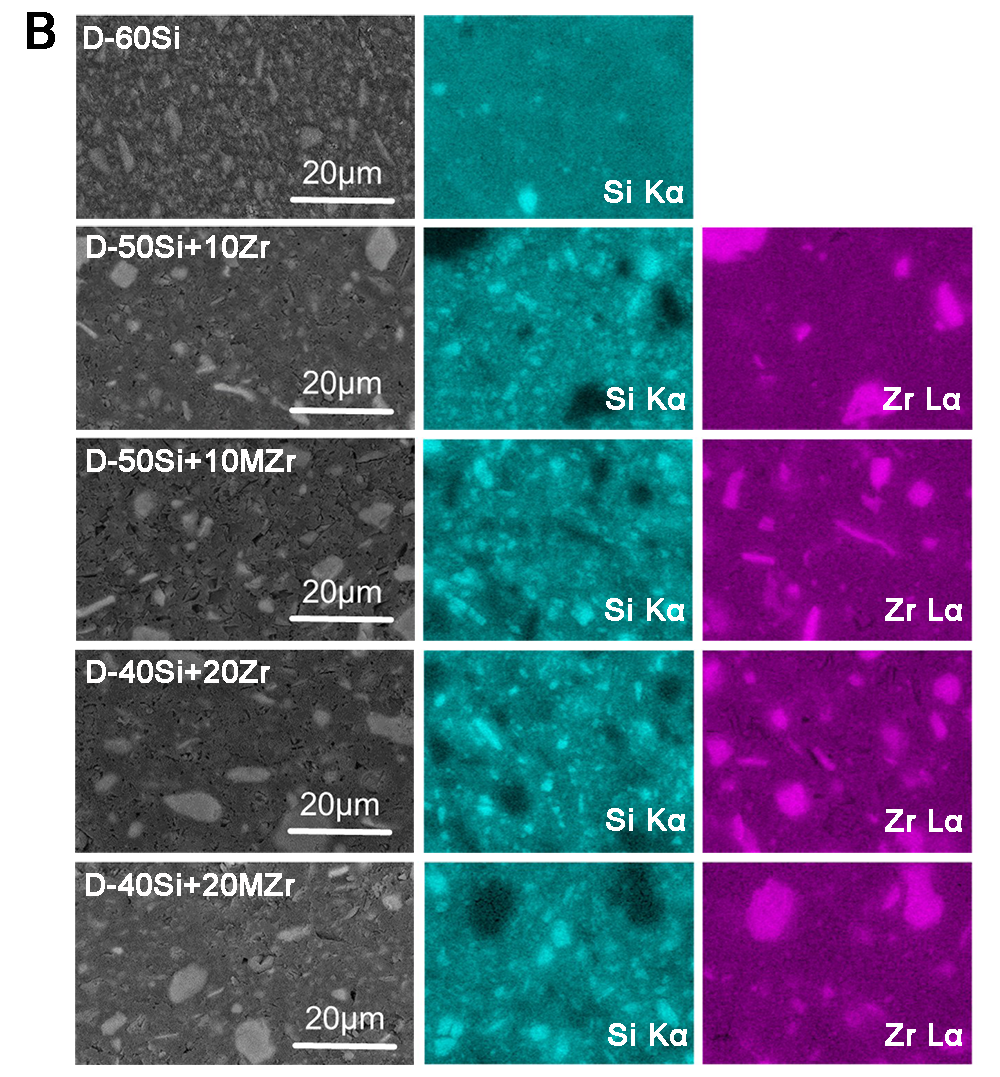

Supplement: Supplementary file 1 [file get_supplementary_file.php]
